# Supplementary material
Source: PubMed Central journal article supplement (PMC5039679)
Supplement: thnov06p2039s1.pdf [file thnov06p2039s1.pdf]

Supplementary Material for

**Size dependent kinetics of gold nanorods in EPR mediated tumor delivery**

Xiao Tong, Zhantong Wang, Xiaolian Sun, Jibin Song, Orit Jacobson, Gang Niu, Dale O. Kieseletter, Xiaoyuan Chen\*

<sup>1</sup>Laboratory of Molecular Imaging and Nanomedicine, National Institute of Biomedical Imaging and Bioengineering, National Institutes of Health, Bethesda, Maryland 20892, United States.

\*Corresponding author: Xiaoyuan Chen ([shawn.chen@nih.gov](mailto:shawn.chen@nih.gov))

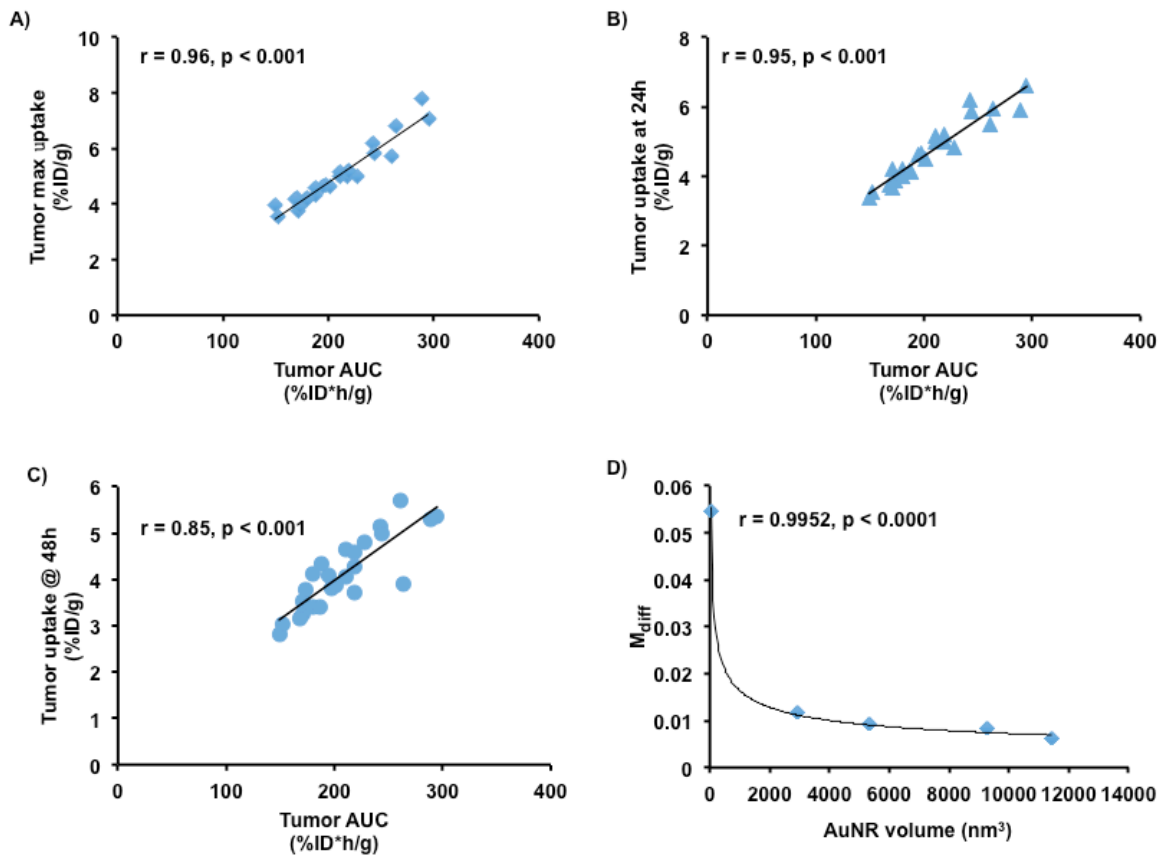

Figure S1: A-C): The correlation between the tumor AUC with the tumor maximum uptake (A), the tumor uptake at 24 h (B) and the tumor uptake at 48 h (C). D) The power regression of diffusion parameter ( $M_{diff}$ ) as a function of AuNR volume. The Pearson correlation coefficient  $r$  and the significance  $p$  values are shown for each correlation and regression.

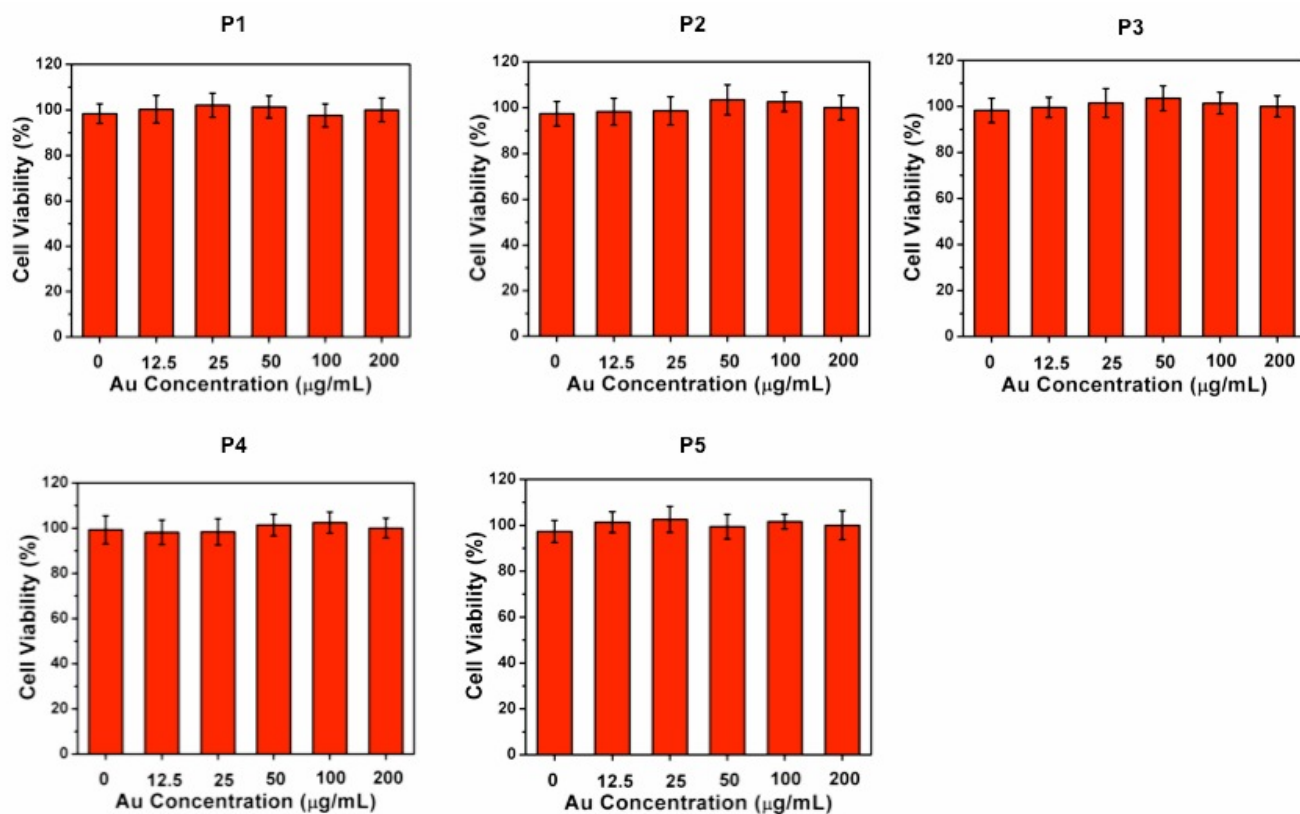

Figure S2: The cytotoxicity of the five AuNRs (P1 to P5) in U87MG cells. Closed to 100% viability indicates no cytotoxicity of these AuNRs.

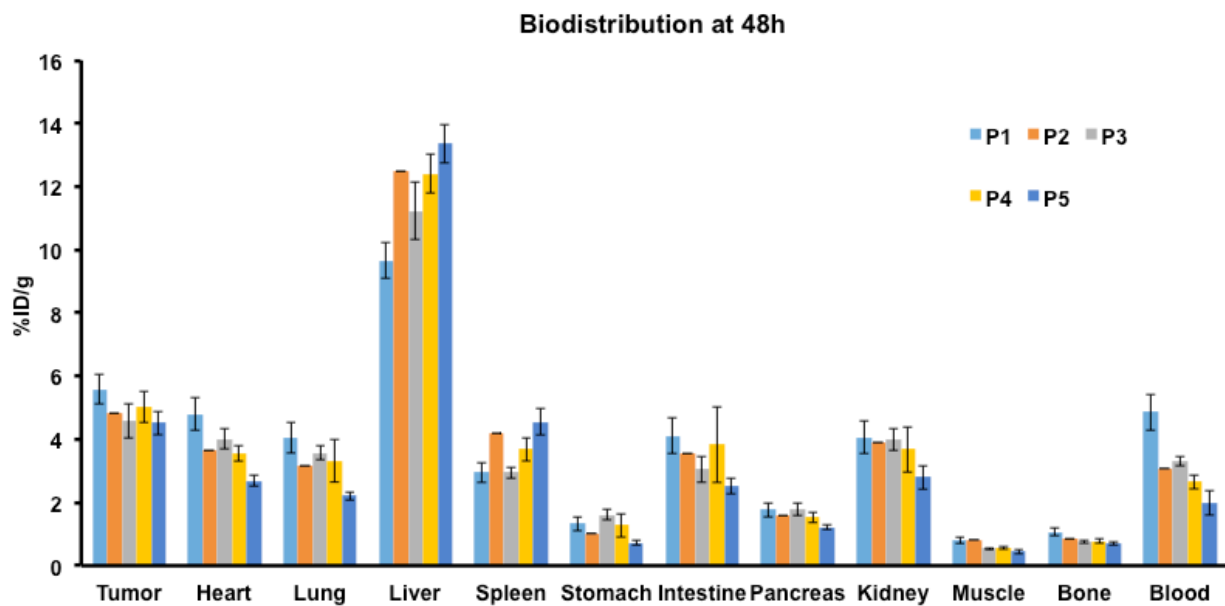

Figure S3: The biodistribution of the five AuNRs (P1 to P5 represented by different colors) at 48 h postinjection of  $^{64}\text{Cu}$ -AuNR. The  $^{64}\text{Cu}$  remained in major organs (weighted) and tissues were measured and expressed in %ID/g.

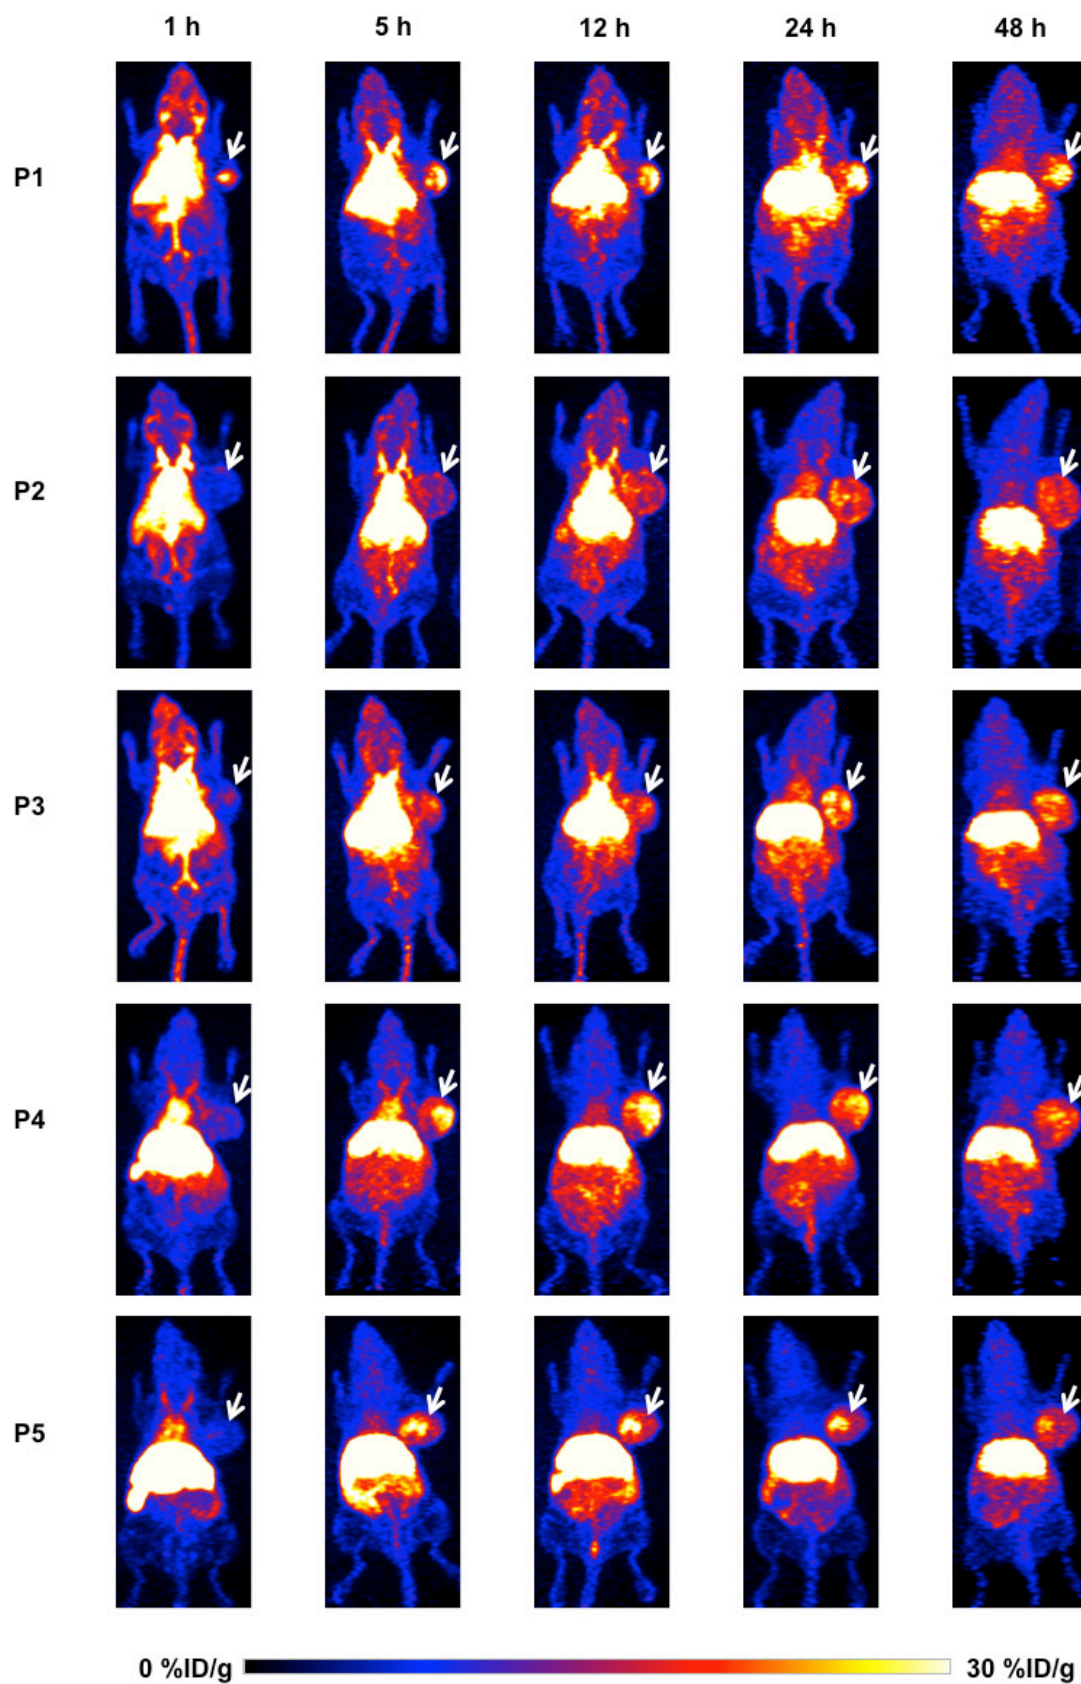

Figure S2 : Maximum intensity projection (MIP) PET images of U87MG tumor-bearing mice at different time points (from left to right) after intravenous injection of  $^{64}\text{Cu}$ -AuNRs (from top to bottom: P1 to P5). Tumors were indicated with white arrows.

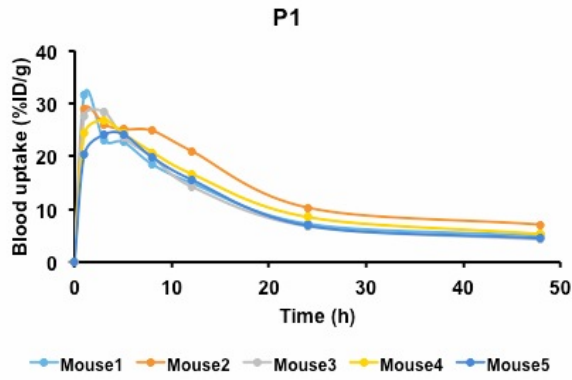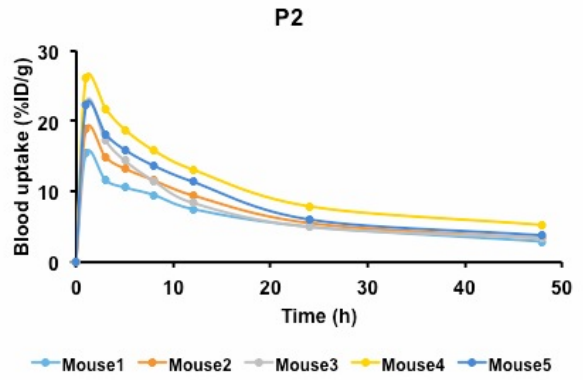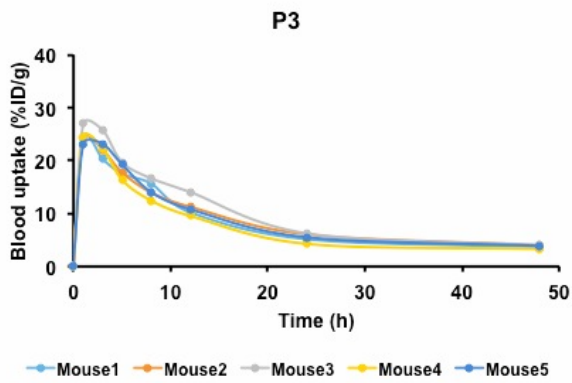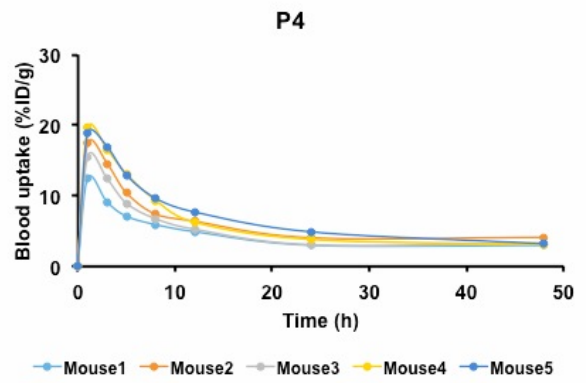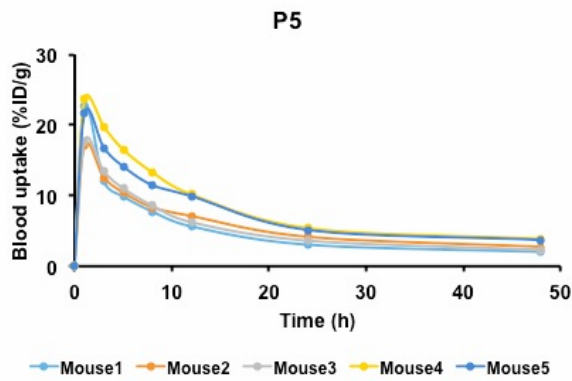

Figure S3 : Blood time activity curves (TAC) of all mice used for each size of AuNR (P1 to P5). The uptake was expressed in %ID/g.

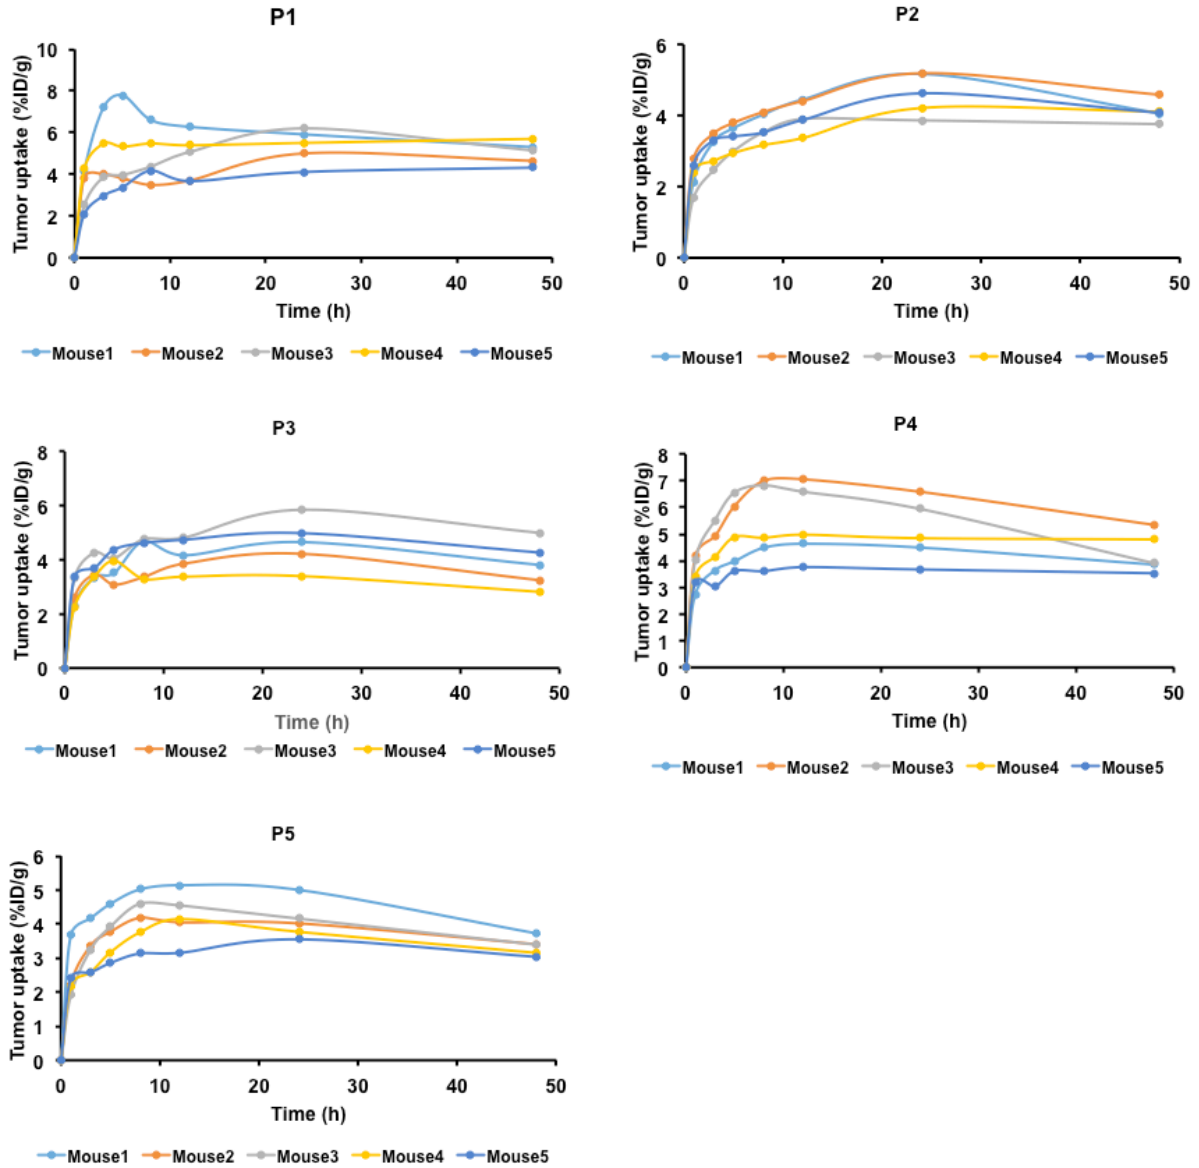

Figure S4: Tumor time activity curves (TAC) of all mice used for each size of AuNR (P1 to P5). The uptake was expressed in %ID/g.

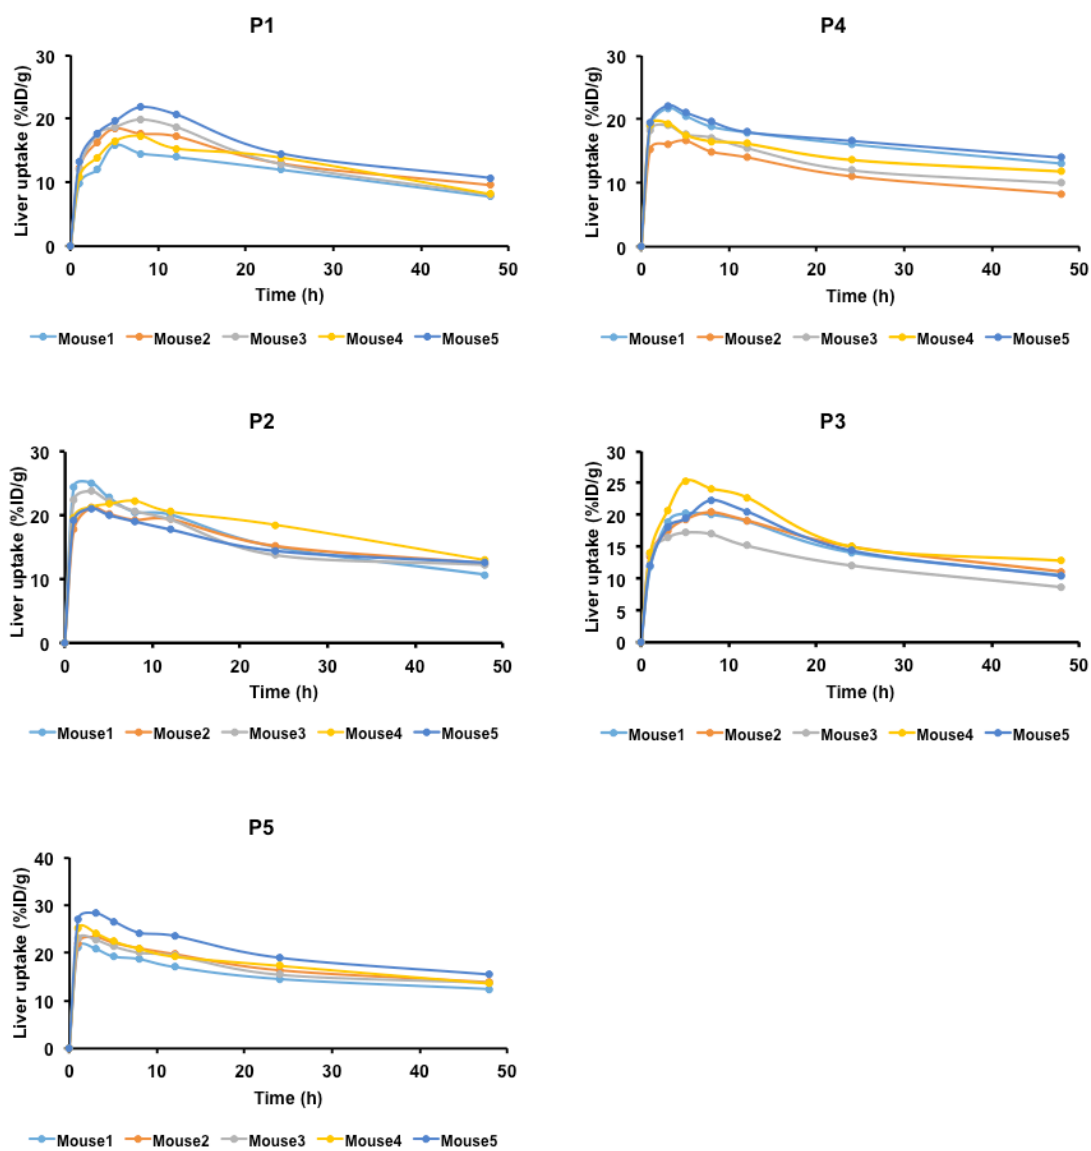

Figure S5: Liver time activity curves (TAC) of all mice used for each size of AuNR (P1 to P5). The uptake was expressed in %ID/g.



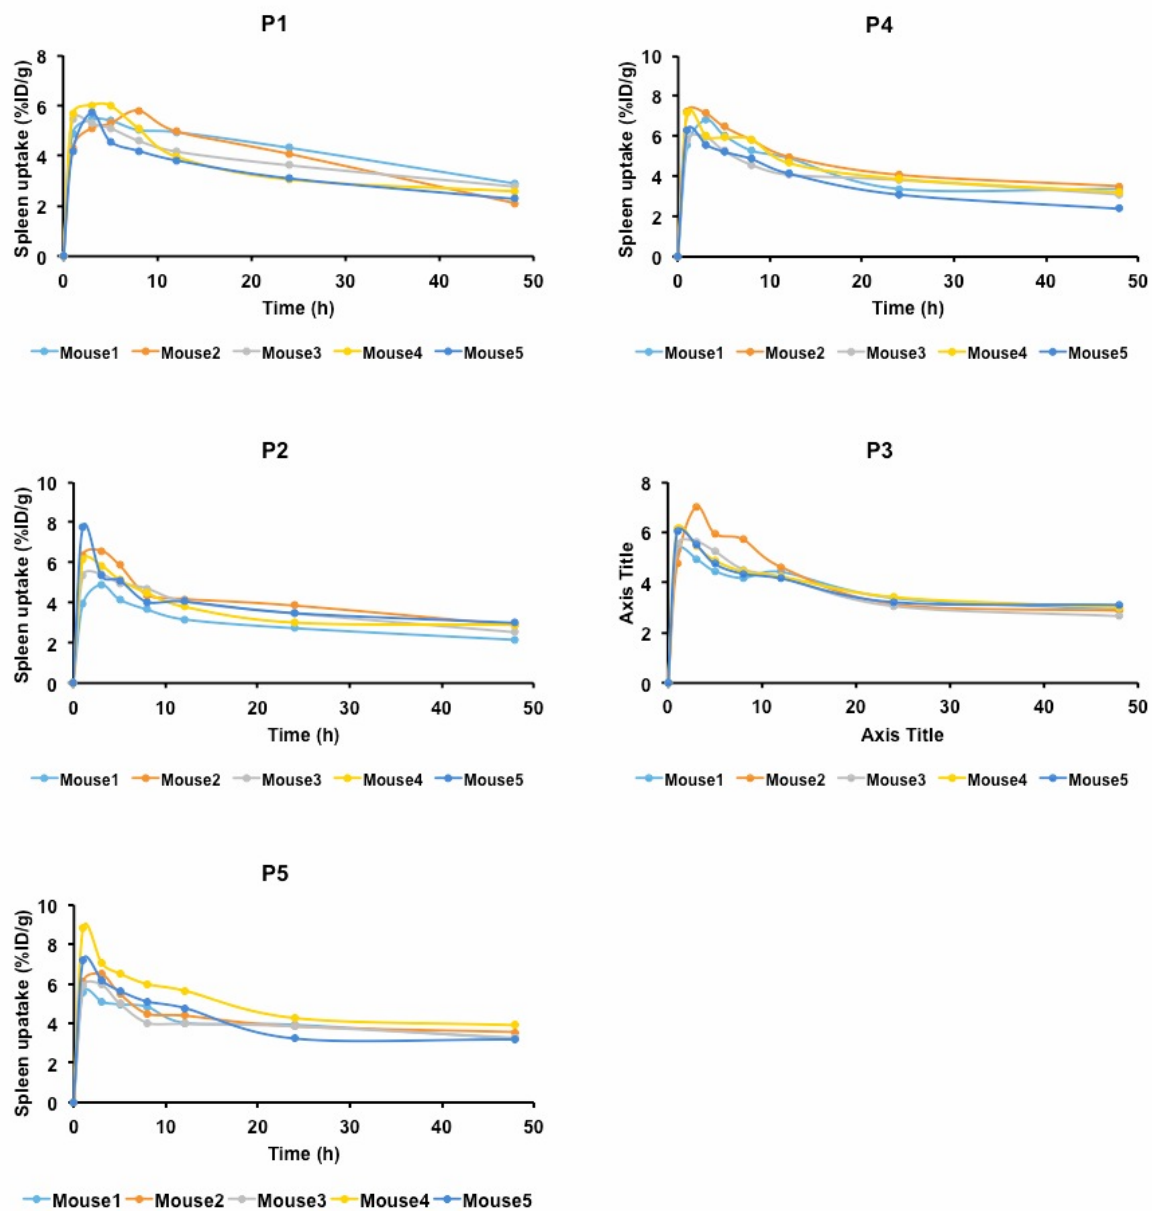

Figure S6: Spleen time activity curves (TAC) of all mice used for each size of AuNR (P1 to P5). The uptake was expressed in %ID/g.

Table S1: Mann-Whitney U test of the mean tumor uptake (mean tumor TAC of Figure 4B) at each time point between the neighboring size of AuNR. The significance p values of the U test are shown here in this table, where  $p < 0.05$  (marked in red color) indicates significant difference between the tumor uptakes of the two sizes.

| Time(h)         | 1       | 3       | 5       | 8       | 12      | 24      | 48      |
|-----------------|---------|---------|---------|---------|---------|---------|---------|
| <b>P1 vs P2</b> | 0.2113  | 0.0601  | 0.0601  | 0.09492 | 0.4009  | 0.2113  | 0.02144 |
| <b>P1 vs P3</b> | 0.4009  | 0.2113  | 0.2113  | 0.5287  | 0.5287  | 0.2113  | 0.03662 |
| <b>P1 vs P4</b> | 1       | 1       | 0.67448 | 0.4009  | 0.4009  | 0.83366 | 0.2113  |
| <b>P1 vs P5</b> | 0.1443  | 0.1443  | 0.2113  | 0.5287  | 0.5287  | 0.0601  | 0.01208 |
| <b>P2 vs P3</b> | 0.29834 | 0.29834 | 0.2113  | 0.4009  | 0.67448 | 1       | 0.67448 |
| <b>P2 vs P4</b> | 0.02144 | 0.0601  | 0.03662 | 0.03662 | 0.09492 | 0.67448 | 1       |
| <b>P2 vs P5</b> | 1       | 1       | 0.5287  | 0.29834 | 0.5287  | 0.1443  | 0.01208 |
| <b>P3 vs P4</b> | 0.09492 | 0.29834 | 0.09492 | 0.2113  | 0.1443  | 0.5287  | 0.4009  |
| <b>P3 vs P5</b> | 0.29834 | 0.5287  | 0.83366 | 0.83366 | 1       | 0.4009  | 0.4009  |
| <b>P4 vs P5</b> | 0.0601  | 0.1443  | 0.09492 | 0.29834 | 0.2113  | 0.2113  | 0.02144 |
